# Supplementary material
Source: PubMed Central journal article supplement (PMC3274355)

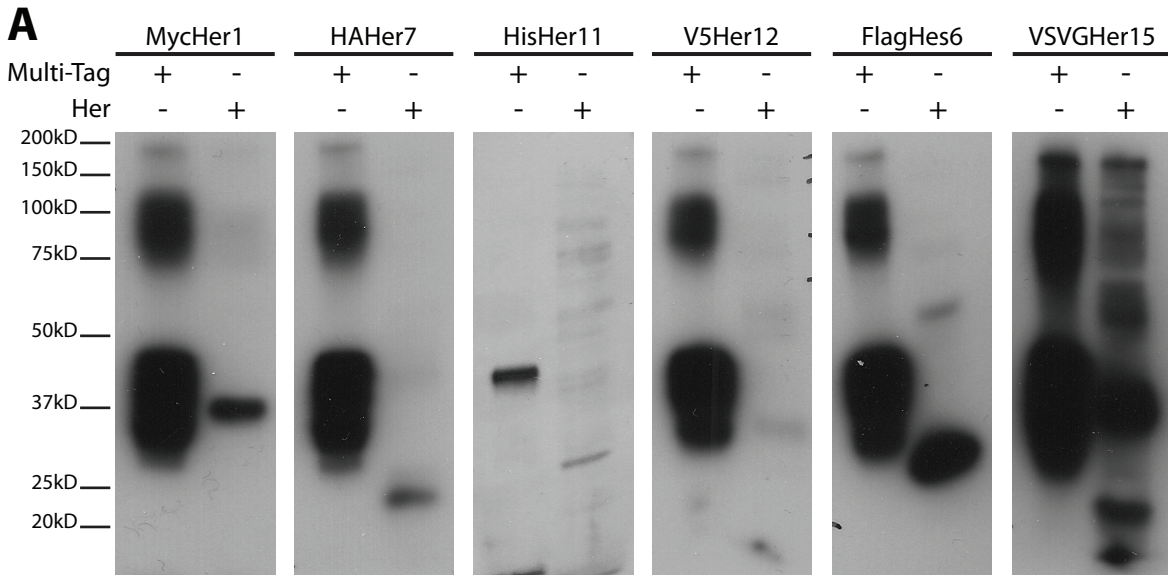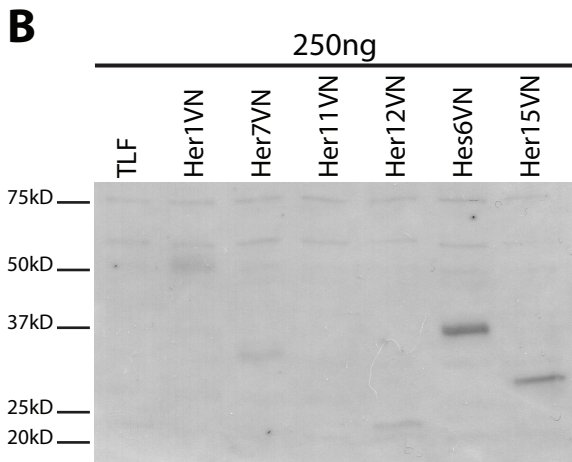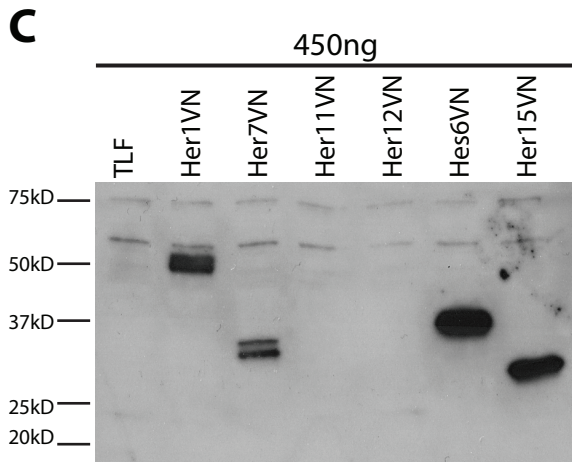

Supplement: supp_139.5.940_DEV073544FigS1.pdf [file supp_139.5.940_DEV073544FigS1.pdf]

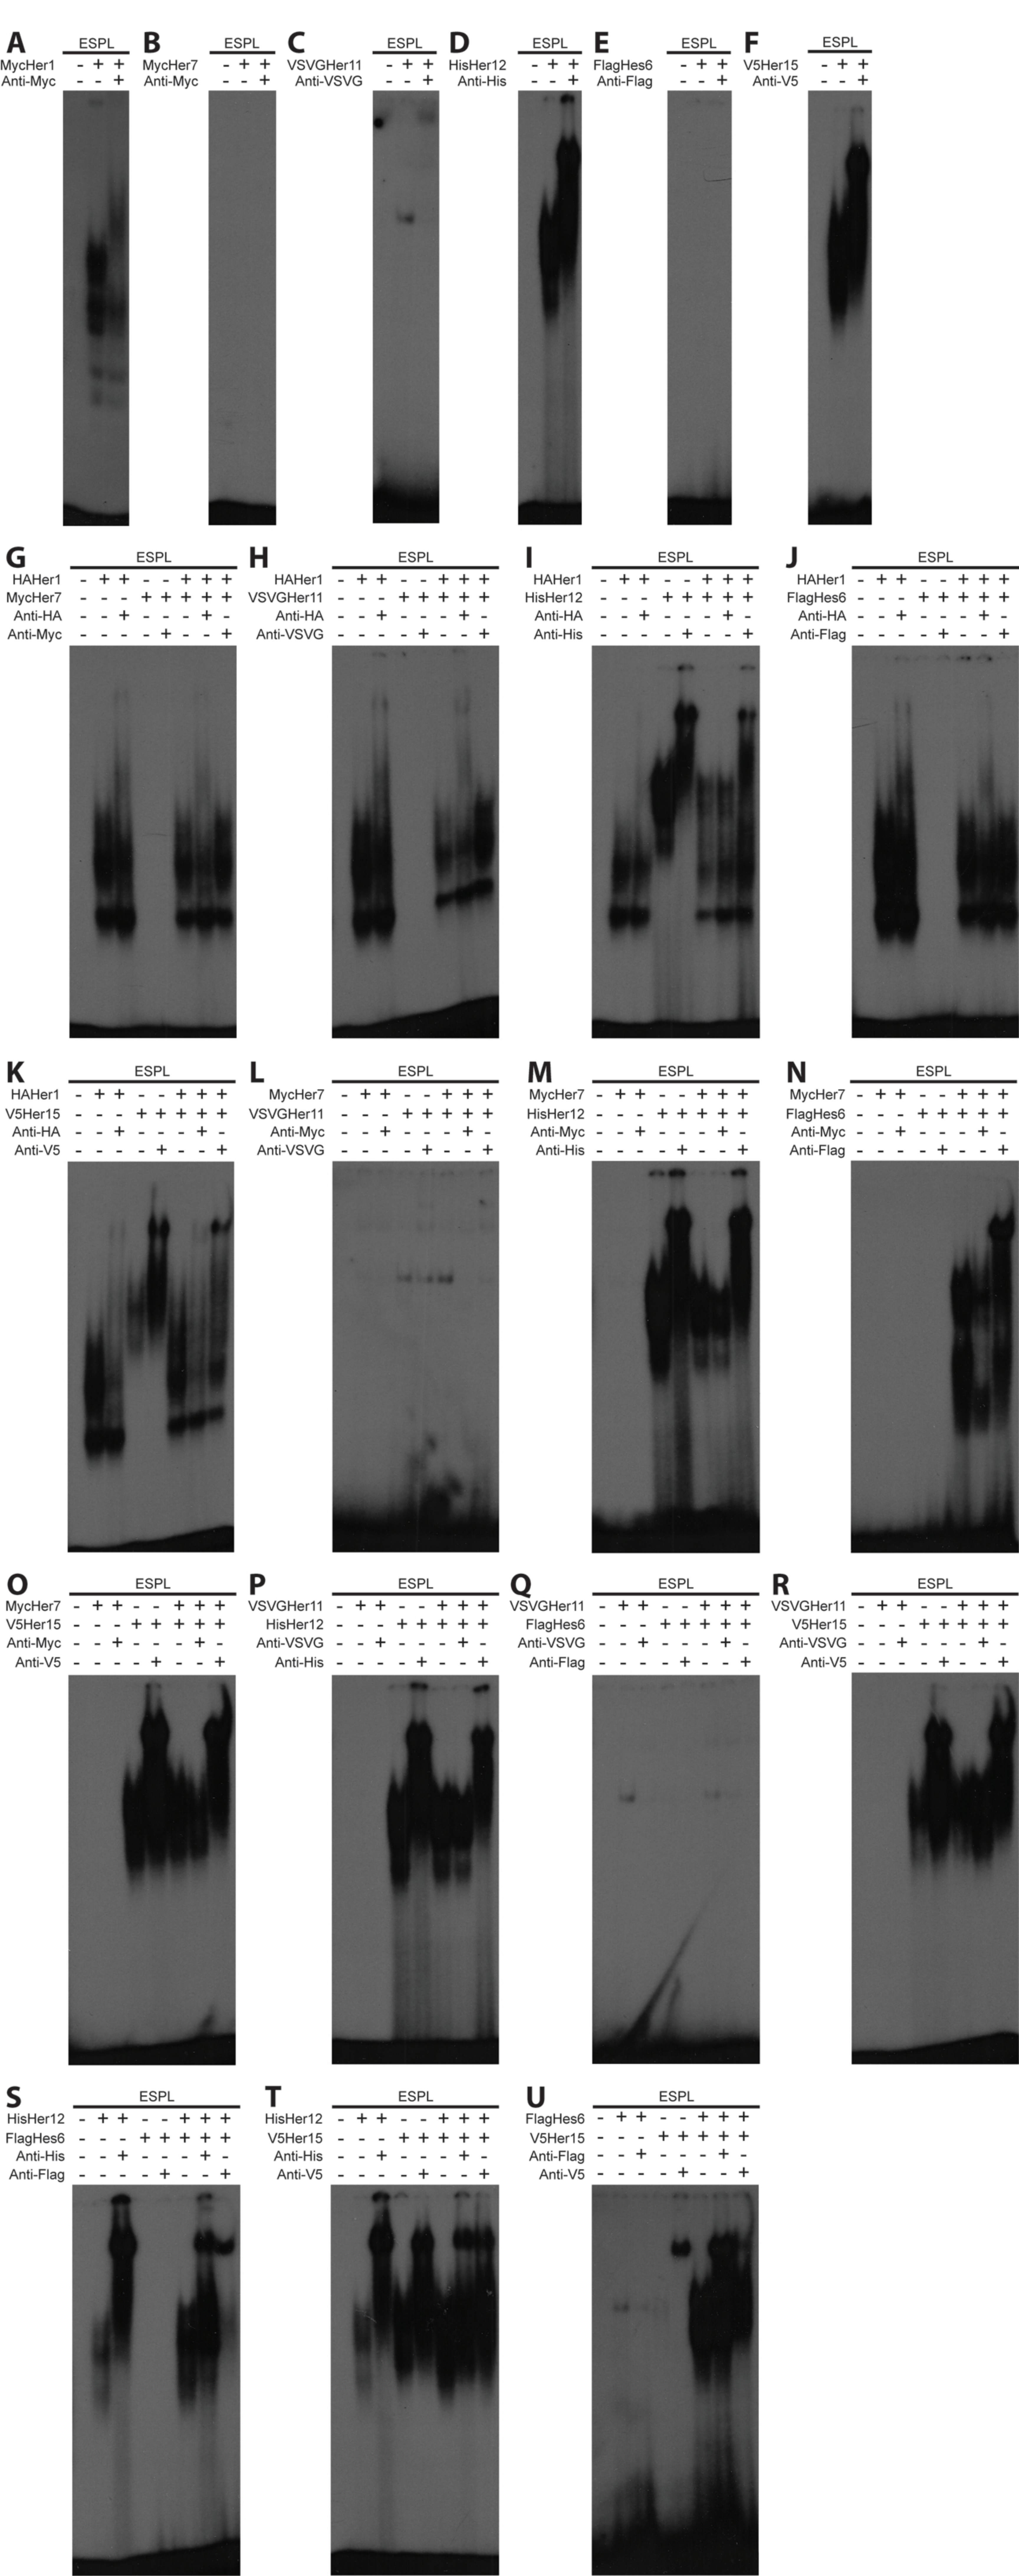

Supplement: supp_139.5.940_DEV073544FigS2.pdf [file supp_139.5.940_DEV073544FigS2.pdf]
